# Supplementary material for: Deformable and flexible electrospun nanofiber-supported cross-linked gel polymer electrolyte membranes for high safety lithium-ion batteries
Source: Royal Society of Chemistry journal article supplement (doi:10.1039/c7ra00112f), 2017-01-01
Supplement: c7ra00112f1.pdf [file c7ra00112f1.pdf]

## Supporting Information

### **Deformable and Flexible Electrospun Supported Cross-linked Gel Polymer Electrolytes for High Safety Lithium Ion Batteries**

Yongfen Tong<sup>a\*</sup>, Yuzhong Xu<sup>a</sup>, Dian Chen<sup>a</sup>, Yu Xie<sup>a\*</sup>, Lie Chen<sup>b</sup>, Mingming Que<sup>b</sup>,  
Yang Hou<sup>c,d\*</sup>

<sup>a</sup>School of Environmental and Chemical Engineering, Nanchang Hangkong  
University, 696 Fenghe South Avenue, Nanchang 330063, China

<sup>b</sup>College of Chemistry, Nanchang University, 999 Xuefu Avenue, Nanchang 330031,  
China

<sup>c</sup>Department of Chemistry and Food Chemistry & Center for Advancing Electronics,  
Dresden (CFAED), Technische Universitaet Dresden, 01062 Dresden, Germany

<sup>d</sup>College of Chemical and Biological Engineering, Zhejiang University, Hangzhou  
310027, P. R. China

**Table S1.** Cross-linking agent composition and ionic conductivity (25 °C) of the composite gel polymer electrolytes.

| Code   | Pentaerythritol<br>tetraacrylate<br>(PTA) | Poly(ethylene<br>glycol)<br>diacrylate<br>(PEGDA) | Poly(ethylene glycol)<br>methyl ether<br>methacrylate<br>(PEGMA) | Conductivity (S/cm) <sup>a</sup> |
|--------|-------------------------------------------|---------------------------------------------------|------------------------------------------------------------------|----------------------------------|
| CGPE-1 | 20                                        | 80                                                | 0                                                                | 9.9×10 <sup>-4</sup>             |
| CGPE-2 | 20                                        | 60                                                | 20                                                               | 1.4×10 <sup>-3</sup>             |
| CGPE-3 | 20                                        | 50                                                | 30                                                               | 1.7×10 <sup>-3</sup>             |
| CGPE-4 | 20                                        | 40                                                | 40                                                               | 1.2×10 <sup>-3</sup>             |
| CGPE-5 | 20                                        | 30                                                | 50                                                               | 6.4×10 <sup>-4</sup>             |

<sup>a</sup> Ionic conductivity of CGPE with 1.0 M LiTFSI + BMITFSI.

**Table S2.** Mechanical properties of the composite gel polymer electrolytes.

| Samples | Stress(MPa) | Modulus (MPa) | Strain (%) |
|---------|-------------|---------------|------------|
| CGPE-1  | 6.5         | 54.0          | 125.6      |
| CGPE-2  | 6.7         | 58.3          | 126.8      |
| CGPE-3  | 6.8         | 62.9          | 128.4      |
| CGPE-4  | 6.8         | 63.8          | 130.5      |
| CGPE-5  | 6.9         | 72.5          | 131.7      |

The mechanical properties of the composite gel polymer electrolytes are presented in Table S1. The value of modulus and strain for the composite membranes increased with the addition of the cross-linking agent and PEGMA. It was suggested that the cross-linked agent enhanced the tensile strength and elastic modulus of electrospun PVDF-HFP, which shows acceptable mechanical properties to be applied in the practice.

**Table S3.** Ionic conductivity of the composite polymer electrolytes base on different ionic liquid.

| Code                    | Pentaerythri<br>-tol<br>tetraacrylate<br>(PTA) | Poly(ethylene<br>glycol)<br>diacrylate<br>(PEGDA) | Poly(ethylene<br>glycol) methyl<br>ether methacrylate<br>(PEGMA) | Ionic<br>liquid    | Conductivi<br>-ty (S/cm) |
|-------------------------|------------------------------------------------|---------------------------------------------------|------------------------------------------------------------------|--------------------|--------------------------|
| CGPE-BMIBF <sub>4</sub> | 20                                             | 50                                                | 30                                                               | BMIBF <sub>4</sub> | 1.9×10 <sup>-3a</sup>    |
| CGPE-3                  | 20                                             | 40                                                | 40                                                               | BMITFSI            | 1.7×10 <sup>-3b</sup>    |
| CGPE-BMITf              | 20                                             | 30                                                | 50                                                               | BMITf              | 8.1×10 <sup>-4c</sup>    |

<sup>a</sup>Ionic conductivity of CGPE with 1.0 M LiBF<sub>4</sub> + BMIBF<sub>4</sub>.

<sup>b</sup>Ionic conductivity of CGPE with 1.0 M LiTFSI + BMITFSI.

<sup>c</sup>Ionic conductivity of CGPE with 1.0 M LiTf + BMITf.

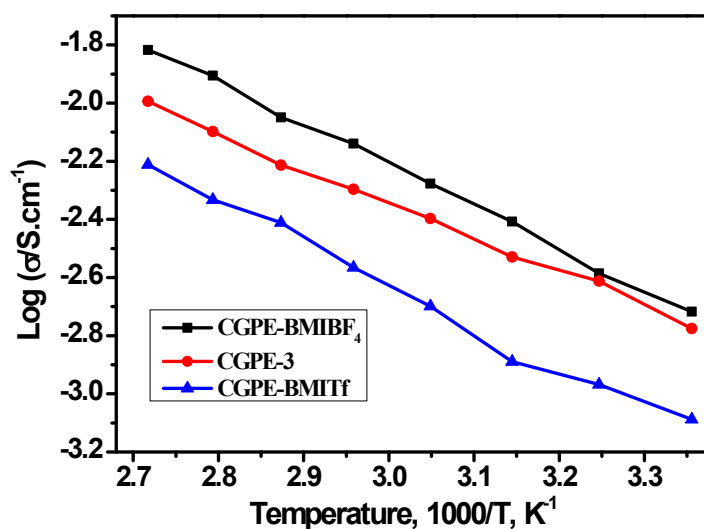

**Figure S1.** Variation of ionic conductivity with temperature of CGPE based on electrospun P(VDF-HFP) and cross-linking matrix with different ionic liquid electrolytes.

The ionic conductivities of the composite gel polymer electrolytes base on ionic liquid with different anion (BMITf and BMIBF<sub>4</sub>) have been investigated. The results demonstrate that the composite gel polymer electrolytes base on BMIBF<sub>4</sub> have the maximum values and the order is CGPE-BMIBF<sub>4</sub> > CGPE-3 > CGPE-BMITf in all the temperature. It is related to the anionic structure and anionic donating ability. The order of the molar conductivity ratio of the three anions is BF<sub>4</sub><sup>-</sup> > TFSI<sup>-</sup> > Tf<sup>-</sup>, which results in the CGPE-BMIBF<sub>4</sub> base on BMIBF<sub>4</sub> possess high ionic conductivity.

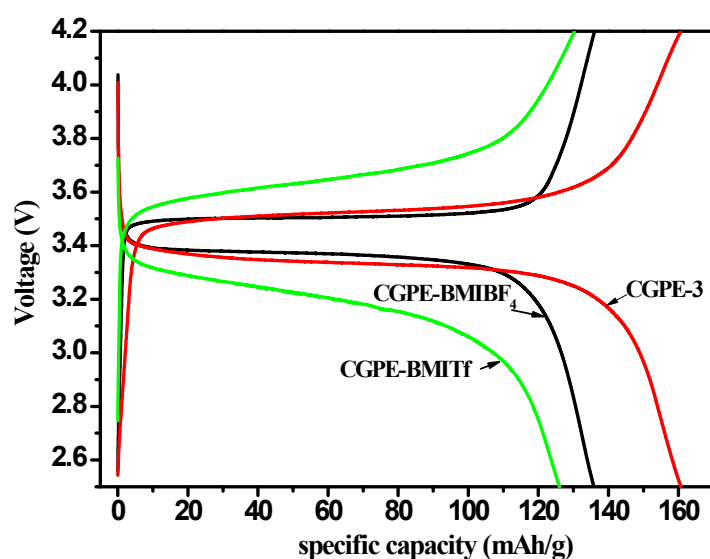

**Figure S2.** Initial discharge capacities of CGPE based on electrospun P(VDF-HFP) and cross-linking matrix with different ionic liquid electrolytes (Li/PE/LiFePO<sub>4</sub> cells, 0.1 C rate, 25 °C).

The Li||LiFePO<sub>4</sub> cell properties with the composite gel polymer electrolytes based on ionic liquid with different anion have been studied. The cells based on BMITFSI (CGPE-3) consistently delivered the highest capacities. The results demonstrate that the anion structure influenced cell performance significantly and the hydrophilic nature of the BMITFSI affords a strong affinity interaction between cross-linking matrix and ionic liquid. It also verifies that the influence of the hydrophilicity of the ionic liquid with the polymer matrix may be a critical deterministic factor in cell performance. In some extent, the electrochemical cell performance correlates more strongly with affinity interaction than conductivity.
